# Supplementary material
Source: MDPI journal article supplement (https://www.mdpi.com/2079-6412/13/2/434)
Supplement: s1 [file s1]

# Supplementary Materials: Corrosion Inhibition of Aluminum in Acidic Solution by *Ilex paraguariensis* (Yerba Mate) Extract as a Green Inhibitor

Claudia M. Méndez <sup>1,2,\*</sup>, Claudio A. Gervasi <sup>3,4</sup>, Gonzalo Pozzi <sup>1</sup> and Alicia E. Ares <sup>1,2,\*</sup>

<sup>1</sup> Programa de Materiales y Físicoquímica, Facultad de Ciencias Exactas, Químicas y Naturales, Universidad Nacional de Misiones, Félix de Azara 1552, Posadas 3300, Argentina

<sup>2</sup> Instituto de Materiales de Misiones—Consejo Nacional de Investigaciones Científicas y Técnicas, Facultad de Ciencias Exactas, Químicas y Naturales, Universidad Nacional de Misiones, Félix de Azara 1552, Posadas 3300, Argentina

<sup>3</sup> Instituto de Investigaciones Físicoquímicas Teóricas y Aplicadas—Consejo Nacional de Investigaciones Científicas y Técnicas, Facultad de Ciencias Exactas, Universidad Nacional de La Plata, Diagonal 113 y 64 S/N, La Plata 1900, Argentina

<sup>4</sup> Area Electroquímica, Facultad de Ingeniería, Universidad Nacional de La Plata, Av. 1 750, La Plata 1900, Argentina

\* Correspondence: cmendez@fceqyn.unam.edu.ar (C.M.M.); aares@fceqyn.unam.edu.ar (A.E.A.)

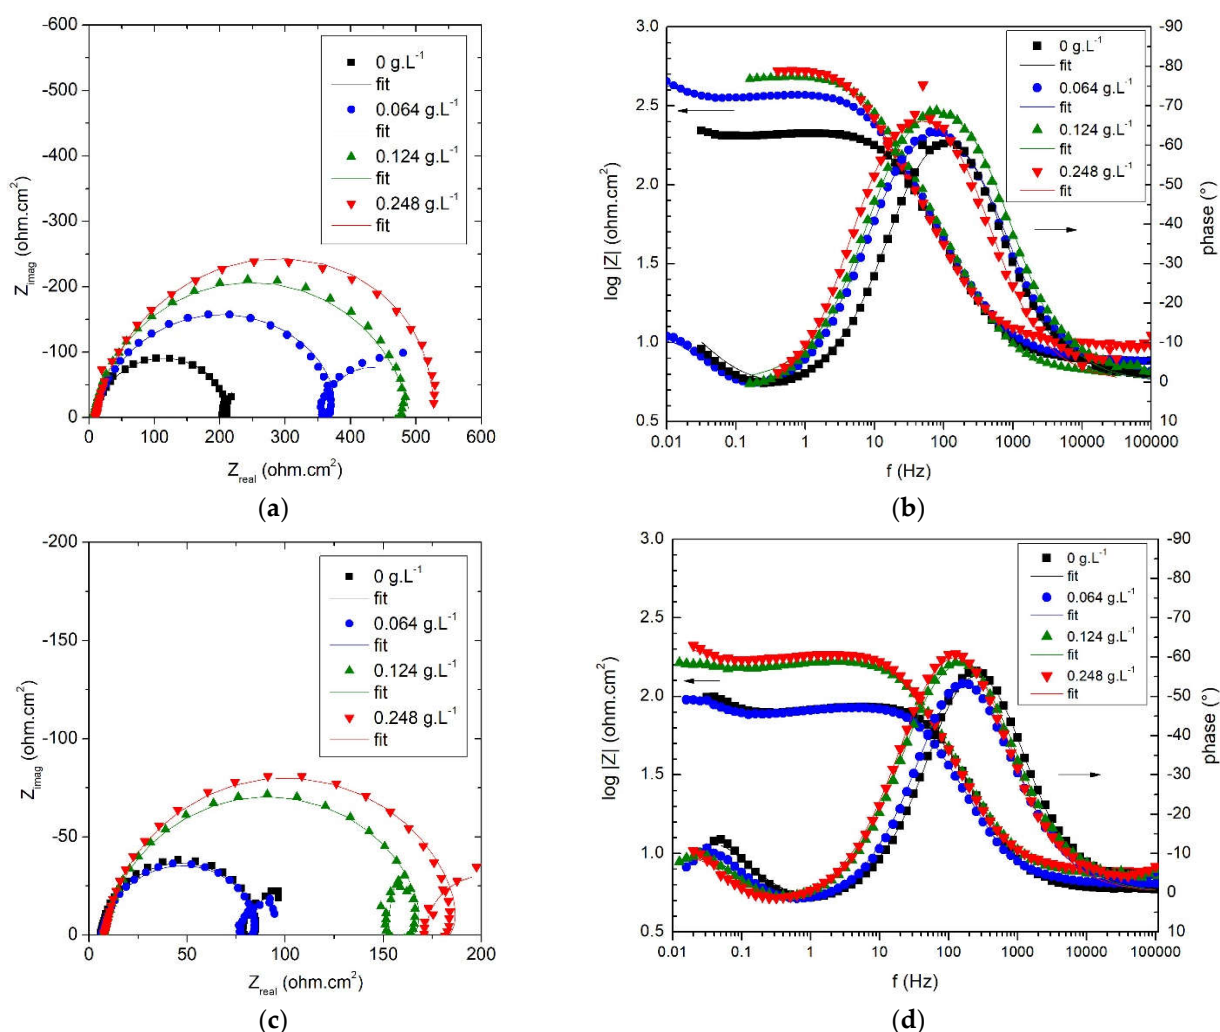

**Figure S1.** Nyquist and Bode representations of experimental data and fit results of electrode impedance recorded for the system Al/0.1 M HCl in the absence and in the presence of different concentrations of the inhibitor at 298 K (a) and (b), and 315 K (c) and (d).
